# Supplementary material for: Impact of Ascorbic Acid on the In Vitro Iron Bioavailability of a Casein-Based Iron Fortificant
Source: MDPI journal article supplement (doi:10.3390/nu12092776), 2020-09-11
Supplement: s1 [file s1]

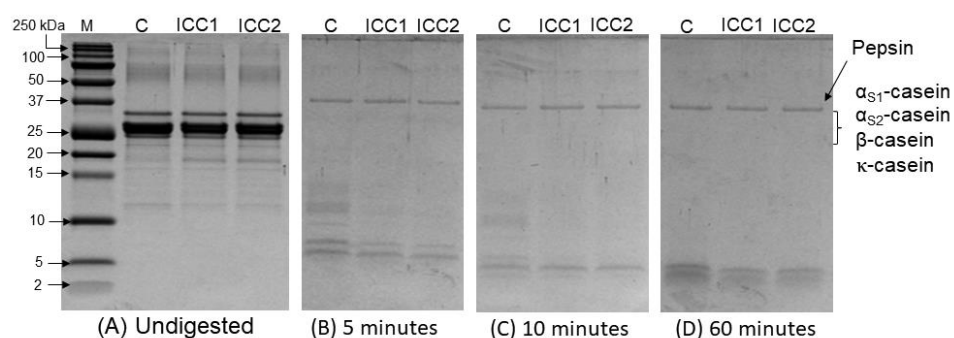

**Figure S1.** Digestibility of sodium caseinate and iron–casein complexes under simulated in vitro gastric digestion at 5, 10, and 60 min. A represents undigested samples while B-D represents hydrolysis profiles after 5, 10 and 60 minutes of digestion. Samples were reconstituted in water (1% w/v) subjected to static digestion at pH 2 and 37°C using pepsin (2000 U/mL). M, molecular weight marker; C, sodium caseinate; ICC1 and ICC2 indicate different batches of iron-casein complexes.
